# Supplementary material for: Syntheses, crystal structures, thermal stabilities, luminescence and magnetism of two 3D pillared metal phosphonates
Source: Royal Society of Chemistry journal article supplement (doi:10.1039/b907619k), 2009-01-01
Supplement: b907619k.pdf [file b907619k.pdf]

## Supplementary information

### Syntheses, crystal structures, thermal stabilities, luminescence and magnetism of two 3D pillared metal phosphonates

Ruibiao Fu\*, Shengmin Hu, Xintao Wu\*

*State Key Laboratory of Structural Chemistry, Fujian Institute of Research on the  
Structure of Matter, Chinese Academy of Science, Fuzhou, Fujian, 350002 China*

\* Corresponding author. E-mail: wxt@fjirsm.ac.cn

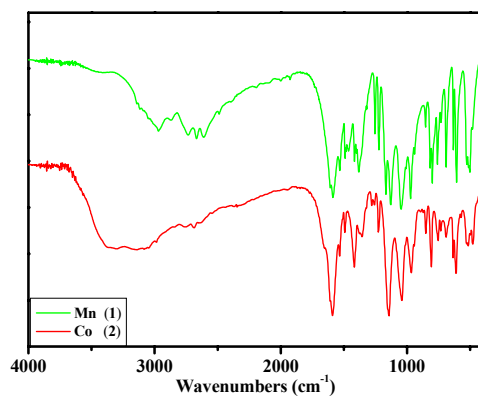

Figure S1. IR curves of compounds 1 and 2.

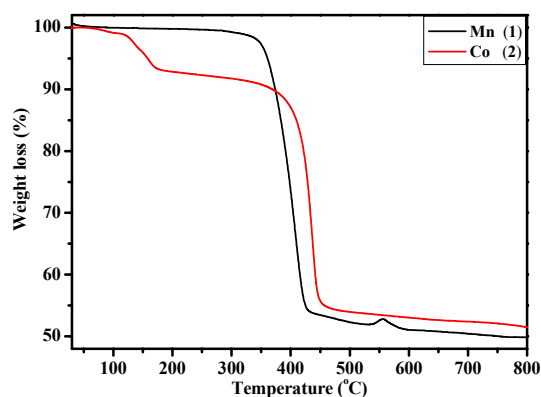

Figure S2. TGA curves of compounds 1 and 2.

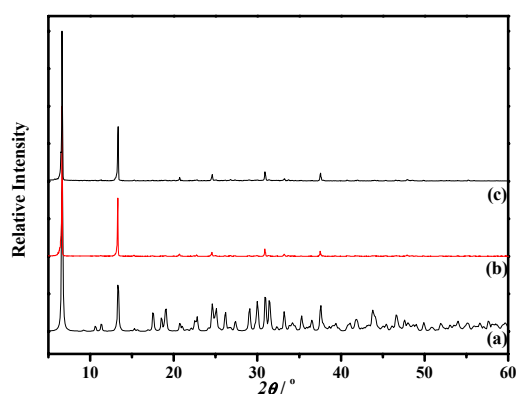

**Figure S3.** The XRD patterns of compound **1** (a) simulated from X-ray single crystal data, (b) polycrystalline as newly synthesized, and (c) polycrystalline annealed at 300 °C.

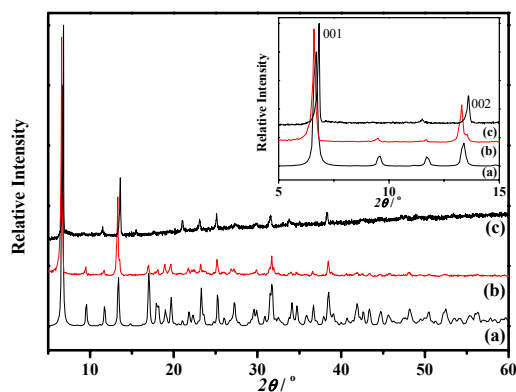

**Figure S4.** The XRD patterns of compound **2** (a) simulated from X-ray single crystal data, and (b) polycrystalline as newly synthesized, and (c) polycrystalline annealed at 170 °C. The inset is the enlarged portion showing the shifts of the XRD peaks.

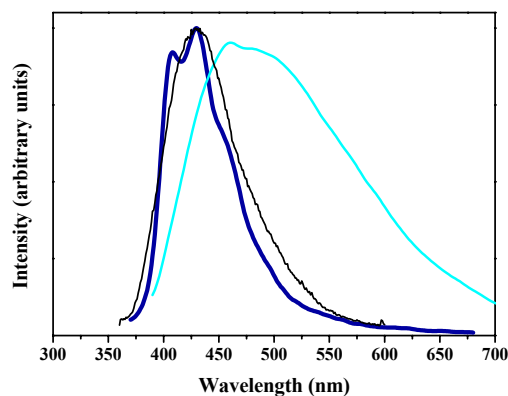

**Figure S5.** Solid-state emission spectra for compound **1** (purple-blue), H<sub>3</sub>L (black) and 4,4'-bipy (blue-green).

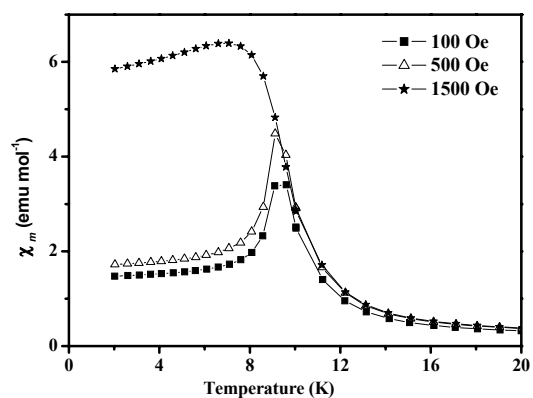

**Figure S6.** Temperature dependence of the zero field-cooled magnetic susceptibility per Mn<sub>3</sub> unit of compound **1**.

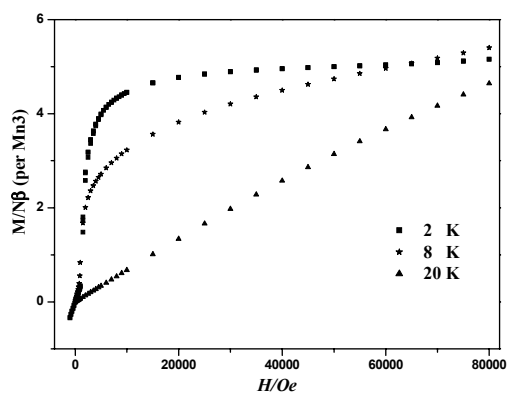

**Figure S7.** *M* versus *H* curves at 2, 8 and 20 K of compound **1**.
